# Supplementary material for: Electrochemical deposition of Pt nanoparticles on carbon nanotube patterns for glucose detection
Source: Royal Society of Chemistry journal article supplement (doi:10.1039/c000316f), 2010-01-01
Supplement: c000316f.pdf [file c000316f.pdf]

## Supporting Information

### Electrochemical Deposition of Pt Nanoparticles on Carbon Nanotube Patterns for Glucose Detection

Zhiyuan Zeng,<sup>[a]</sup> Xiaozhu Zhou,<sup>[a]</sup> Xiao Huang,<sup>[a]</sup> Zhijuan Wang,<sup>[a]</sup> Yanli Yang,<sup>[a,b]</sup> Qichun Zhang,<sup>[a]</sup> Freddy Boey,<sup>[a,b]</sup> Hua Zhang<sup>[a,b],\*</sup>

<sup>a</sup>School of Materials Science and Engineering, Nanyang Technological University, 50 Nanyang Avenue, Singapore 639798, Singapore

<sup>b</sup>Centre for Biomimetic Sensor Science, Nanyang Technological University, 50 Nanyang Drive, Singapore 637553.

Tel: (+65) 6790 5175; Fax: (+65) 6790 9081.

E-mail: [HZhang@ntu.edu.sg](mailto:HZhang@ntu.edu.sg); [h Zhang166@yahoo.com](mailto:h Zhang166@yahoo.com).

Website: <http://www.ntu.edu.sg/home/hzhang/>.

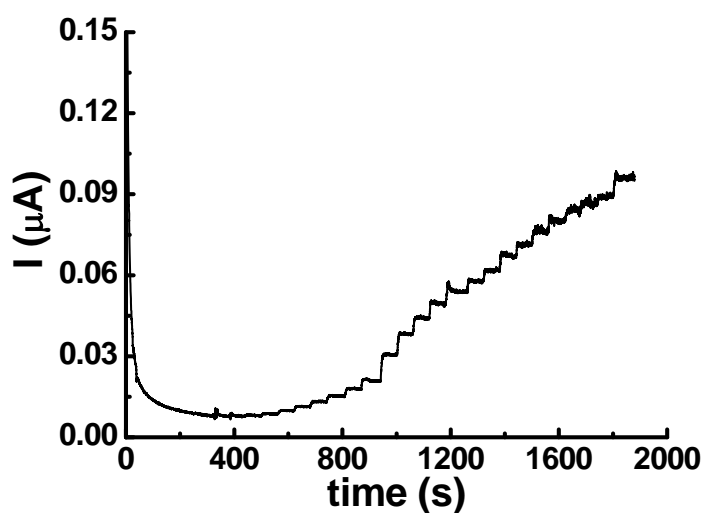

**Figure S1.** Performance of SWCNT pattern electrode in amperometric detection of H<sub>2</sub>O<sub>2</sub> at +0.55 V vs Ag/AgCl (sat. KCl) at 25 °C.

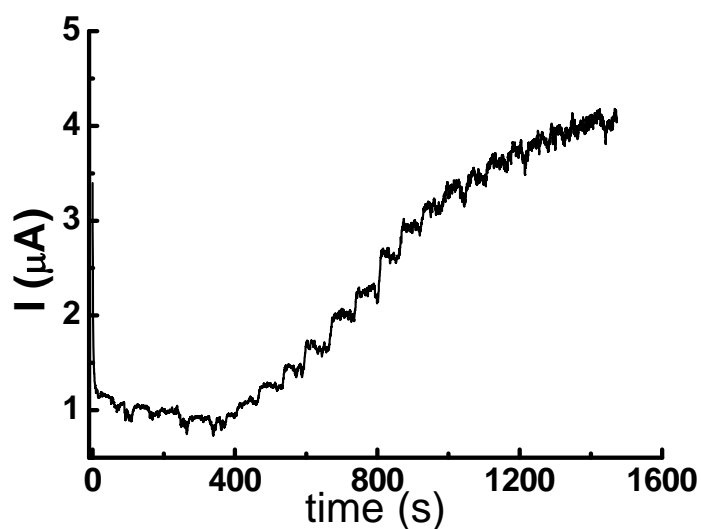

**Figure S2.** Amperometric response of GOx/BSA/SWCNT electrode upon successive additions of glucose solution in a 10 mM phosphate buffer (pH 7.4, containing 3 mM *p*-benzoquinone as the redox mediator) at + 0.35 V vs Ag/AgCl (sat. KCl) at 25 °C.
